# Supplementary material
Source: HighWire-hosted journal article supplement (https://injuryprevention.bmj.com/highwire/filestream/145730/field_highwire_adjunct_files/0/126360webonlysupp1.pdf)
Supplement: 126360webonlysupp1.pdf [file 126360webonlysupp1.pdf]

# **Appendix:** **Number of PEDESTRIAN victims** **for each Montreal borough according** **to Urgences-santé (1999-2003)**

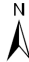

## **Number of victims**

7 - 50

51 - 120

121 - 320

321 - 801

1, 2,... : rank (see Table)

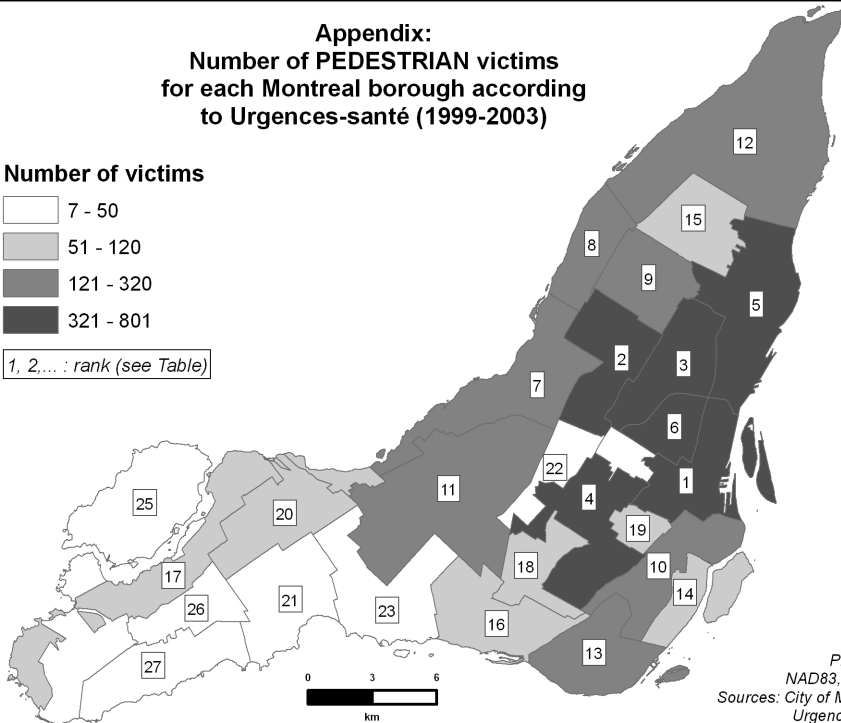

Projection:  
 NAD83, MTM Z8

Sources: City of Montreal,  
 Urgences-santé
